# Supplementary material
Source: PubMed Central journal article supplement (PMC8581954)
Supplement: NIHMS1610295-supplement-1.pdf [file NIHMS1610295-supplement-1.pdf]

| <b>SARS</b> | <b>PDB ID</b> | <b>Chain(s)</b> | <b>RBD State</b> | <b>Mutations</b> | <b>Ligand(s)</b> | <b>Cleaved</b> |
|-------------|---------------|-----------------|------------------|------------------|------------------|----------------|
|             | <b>5x58</b>   | A               | down             |                  |                  | no             |
|             | 5x5b          | A               | up               |                  |                  | no             |
|             | 5x5b          | B               | down             |                  |                  | no             |
|             | 5x5b          | C               | down             |                  |                  | no             |
|             | <b>5xlr</b>   | A               | down             | R667A            |                  | no             |
|             | 6acc          | A               | down             |                  |                  | yes            |
|             | <b>6acd</b>   | A               | down             |                  |                  | yes            |
|             | <b>6acd</b>   | B               | down             |                  |                  | yes            |
|             | <b>6acd</b>   | C               | up               |                  |                  | yes            |
|             | 6acg          | A               | down             |                  |                  | yes            |
|             | 6acg          | B               | down             |                  |                  | yes            |
|             | 6acg          | C               | up               |                  | ACE2             | yes            |
|             | <b>6acj</b>   | A               | down             |                  |                  | yes            |
|             | <b>6acj</b>   | B               | down             |                  |                  | yes            |
|             | <b>6acj</b>   | C               | up               |                  | ACE2             | yes            |
|             | 6ack          | A               | down             |                  |                  | yes            |
|             | 6ack          | B               | down             |                  |                  | yes            |
|             | 6ack          | C               | up               |                  | ACE2             | yes            |
|             | <b>6crw</b>   | A               | down             | 2P               |                  | no             |
|             | <b>6crw</b>   | B               | up               | 2P               |                  | no             |
|             | <b>6crw</b>   | C               | down             | 2P               |                  | no             |
|             | 6crx          | A               | up               | 2P               |                  | no             |
|             | 6crx          | B               | up               | 2P               |                  | no             |
|             | 6crx          | C               | down             | 2P               |                  | no             |
|             | <b>6crz</b>   | A               | down             | 2P               |                  | yes            |
|             | <b>6crz</b>   | B               | up               | 2P               |                  | yes            |
|             | <b>6crz</b>   | C               | down             | 2P               |                  | yes            |
|             | 6cs1          | A               | up               | 2P               |                  | yes            |
|             | 6cs1          | B               | up               | 2P               |                  | yes            |
|             | 6cs1          | C               | down             | 2P               |                  | yes            |
|             | <b>6cs2</b>   | B               | up               | 2P               | ACE2             | no             |
|             | 6nb6          | A               | down             | 2P               |                  | no             |
|             | 6nb6          | B               | up               | 2P               | S230             | no             |
|             | 6nb6          | C               | up               | 2P               | S230             | no             |
|             | <b>6nb7</b>   | A               | up               | 2P               | S230             | no             |
|             | <b>6nb7</b>   | B               | up               | 2P               | S230             | no             |
|             | <b>6nb7</b>   | C               | up               | 2P               | S230             | no             |

| <i>MERS</i> | <i>PDB ID</i> | <i>Chain(s)</i> | <i>RBD State</i> | <i>Mutations</i>    |
|-------------|---------------|-----------------|------------------|---------------------|
|             | <b>5w9h</b>   | A and p         | up               | 2P and 748-ASVG-751 |
|             | <b>5w9h</b>   | D and q         | down             | 2P and 748-ASVG-752 |
|             | <b>5w9h</b>   | G and r         | down             | 2P and 748-ASVG-753 |
|             | 5w9j          | A and K         | down             | 2P and 748-ASVG-754 |
|             | <b>5w9k</b>   | A and J         | up               | 2P and 748-ASVG-755 |
|             | <b>5w9k</b>   | D and K         | down             | 2P and 748-ASVG-756 |
|             | <b>5w9k</b>   | G and L         | up               | 2P and 748-ASVG-757 |
|             | 5w9l          | A and B         | up               | 2P and 748-ASVG-758 |
|             | 5w9l          | C and D         | down             | 2P and 748-ASVG-759 |
|             | 5w9l          | G and J         | down             | 2P and 748-ASVG-760 |
|             | <b>5w9m</b>   | A and E         | up               | 2P and 748-ASVG-761 |
|             | <b>5w9m</b>   | D and F         | down             | 2P and 748-ASVG-762 |
|             | <b>5w9m</b>   | G and J         | down             | 2P and 748-ASVG-763 |
|             | 5w9n          | A and H         | up               | 2P and 748-ASVG-764 |
|             | 5w9n          | D and I         | down             | 2P and 748-ASVG-765 |
|             | 5w9n          | G and J         | down             | 2P and 748-ASVG-766 |
|             | <b>5w9o</b>   | A and J         | up               | 2P and 748-ASVG-767 |
|             | <b>5w9o</b>   | D and K         | down             | 2P and 748-ASVG-768 |
|             | <b>5w9o</b>   | G and L         | down             | 2P and 748-ASVG-769 |
|             | 5x59          | A               | up               | R751S               |
|             | 5x59          | B               | up               | R751S               |
|             | 5x59          | C               | up               | R751S               |
|             | <b>5x5c</b>   | A               | up               | R751S               |
|             | <b>5x5c</b>   | B               | down             | R751S               |
|             | <b>5x5c</b>   | C               | up               | R751S               |
|             | 5x5f          | A               | down             | R751S               |
|             | 5x5f          | B               | down             | R751S               |
|             | 5x5f          | C               | up               | R751S               |
|             | <b>6nb3</b>   | A               | down             | 2P and R667A        |
|             | <b>6nb3</b>   | B               | down             | 2P and R667A        |
|             | 6nb4          | A               | down             | 2P and R667A        |
|             | <b>6q04</b>   | A               | down             | 2P                  |
|             | 6q05          | A               | down             | 2P                  |
|             | <b>6q06</b>   | A               | down             | 2P                  |
|             | 6q07          | A               | down             | 2P                  |

| <i>Ligand(s)</i>                            | <i>Cleaved</i> | <i>SARS-CoV-2</i> | <i>PDB ID</i> |
|---------------------------------------------|----------------|-------------------|---------------|
| G4                                          | no             |                   | <b>6vsb</b>   |
| G4                                          | no             |                   | <b>6vsb</b>   |
| G4                                          | no             |                   | <b>6vsb</b>   |
| G4                                          | no             |                   | 6vxx          |
| G4                                          | no             |                   | <b>6vyb</b>   |
| G4                                          | no             |                   | <b>6vyb</b>   |
| G4                                          | no             |                   | <b>6vyb</b>   |
|                                             | no             | Murine            |               |
| G4                                          | no             |                   | 3jcl          |
| G4                                          | no             | HKU1              |               |
| G4                                          | no             |                   | 5i08          |
|                                             | no             | OC43              |               |
| G4                                          | no             |                   | 6ohw          |
| G4                                          | no             |                   |               |
| G4                                          | no             |                   |               |
|                                             | no             |                   |               |
| G4                                          | no             |                   |               |
| G4                                          | no             |                   |               |
| G4                                          | no             |                   |               |
|                                             | no             |                   |               |
| LCA60                                       | no             |                   |               |
| LCA60                                       | no             |                   |               |
| LCA60                                       | no             |                   |               |
| 5-N-acetyl neuraminic acid<br>sialyl-lewisX |                |                   |               |
| 2,3-sialyl-N-acetyl-lactosamine             |                |                   |               |
| 2,6-sialyl-N-acetyl-lactosamine             |                |                   |               |

| <b>Chain(s)</b> | <b>RBD State</b> | <b>Mutations</b>     | <b>Ligand(s)</b> | <b>Cleaved</b> |
|-----------------|------------------|----------------------|------------------|----------------|
| A               | up               | 2P and 682-GSAS-685  |                  | no             |
| B               | down             | 2P and 682-GSAS-685  |                  | no             |
| C               | down             | 2P and 682-GSAS-685  |                  | no             |
| A               | down             | 2P and 682-SG-GS-686 |                  | no             |
| A               | down             | 2P and 682-SG-GS-687 |                  | no             |
| B               | up               | 2P and 682-SG-GS-688 |                  | no             |
| C               | down             | 2P and 682-SG-GS-689 |                  | no             |
|                 | down             | R717S                |                  | no             |
|                 | down             | 752-GGSGS-756        |                  | no             |
|                 | down             | 754-GGSGG-758        |                  | no             |
